# Supplementary material for: Central fibrous area in the glomerular vascular pole consists of fibrous collagens and is associated with advanced age: a cross-sectional study
Source: Springer Nature journal article supplement (doi:10.1186/s12882-022-02835-2), 2022-06-11

S1 Figure

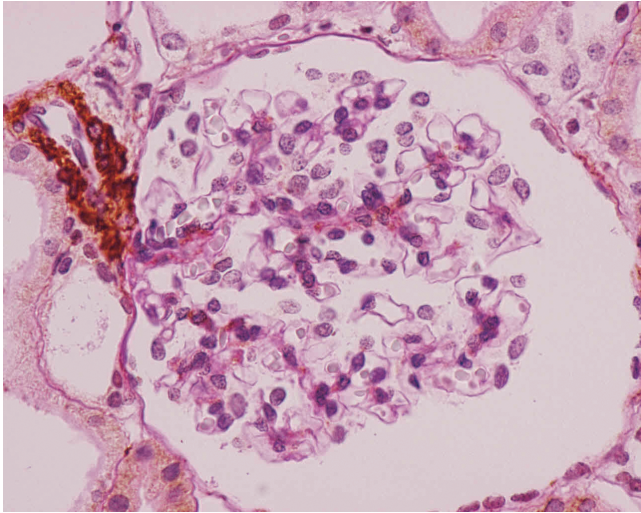

Supplement: MOESM2 [file 23152284]
